# Supplementary material for: ACE2 Expression and its Prognostic Significance in Head and Neck Squamous Cell Carcinoma
Source: Research Square preprint supplement (doi:10.21203/rs.3.rs-150864/v1), 2021-01-21
Supplement: Supplementary file 1 [file 6a9232fb40bf30bf3458c0a1.docx]

|  | Comparison | P value |
| --- | --- | --- |
| Grade | Normal-vs-Grade1 | 5.283700E-03 |
| Normal-vs-Grade2 | 1.81327999999592E-05 |
| Normal-vs-Grade3 | 2.137500E-03 |
| Nodal metastasis status | Normal-vs-N0 | 8.24480000050087E-07 |
| Normal-vs-N1 | 1.432430E-02 |
| Normal-vs-N2 | 2.864400E-03 |

**Table S2** Methylation data downloaded from the UALCAN Website
